# Supplementary material
Source: bioRxiv or medRxiv preprint supplement (https://www.biorxiv.org/highwire/filestream/45630/field_highwire_adjunct_files/1/153130-2.pdf)
Supplement: Supplementary file [file 153130-2.pdf]

**Figure S1 A**

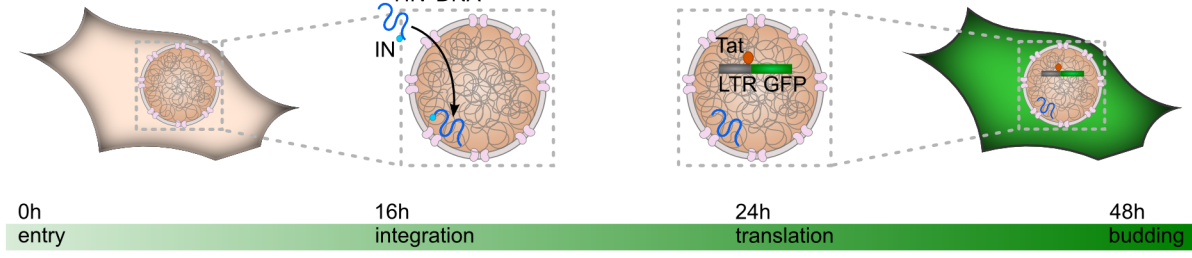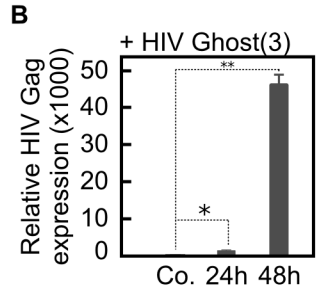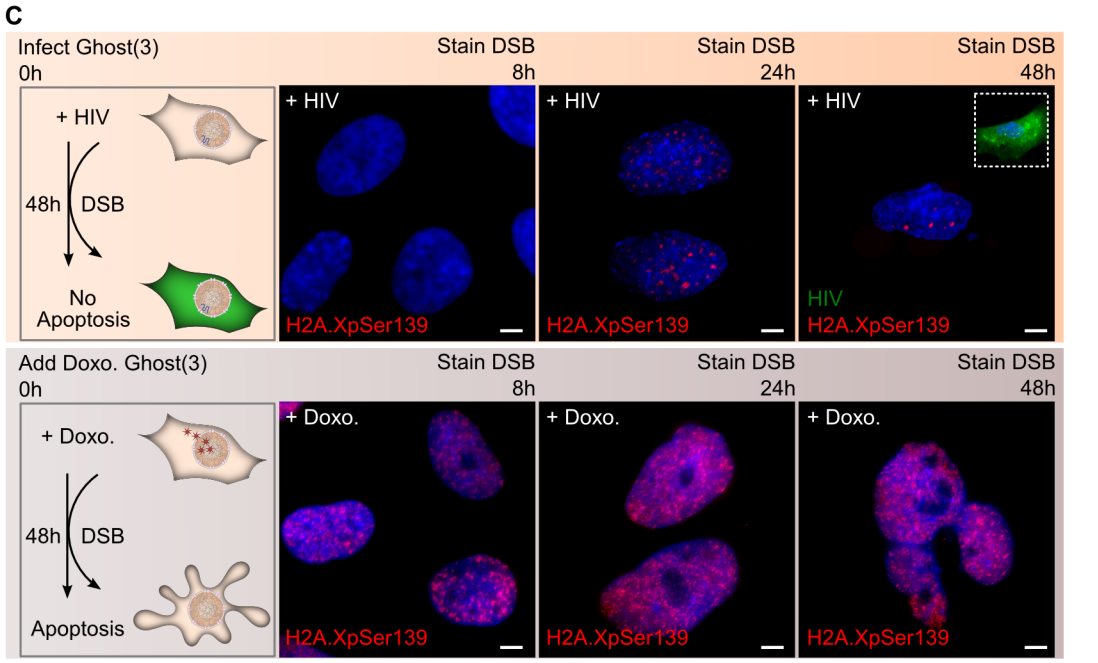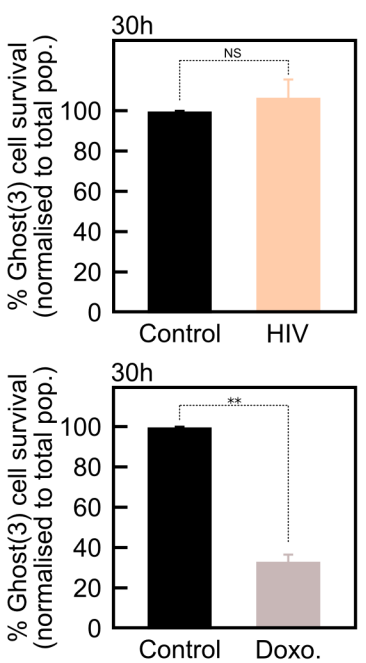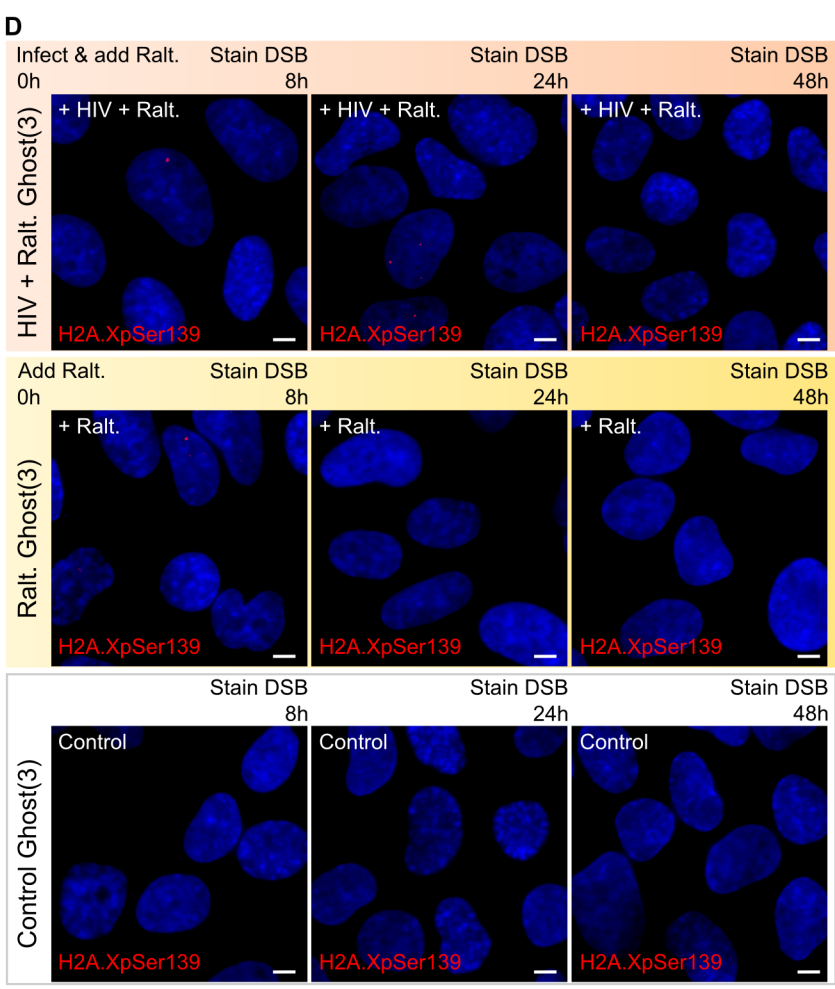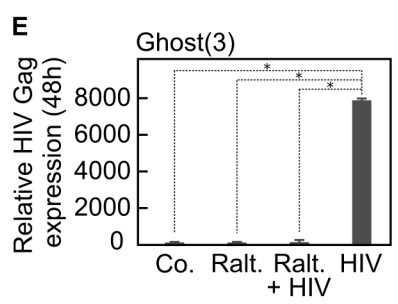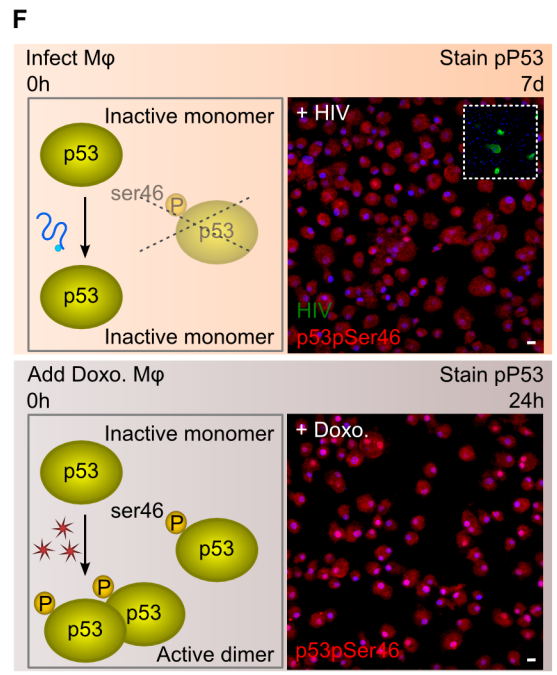

**Figure S2 A**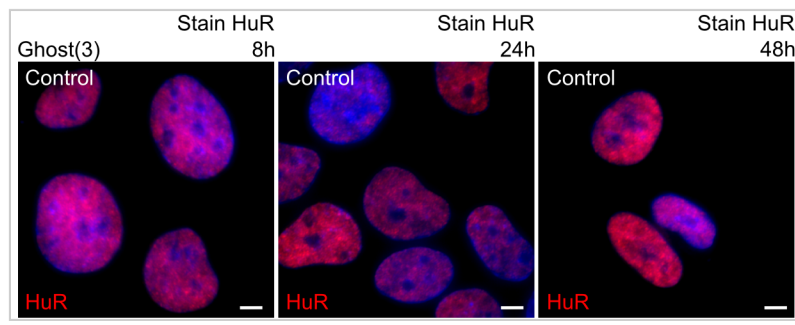**B**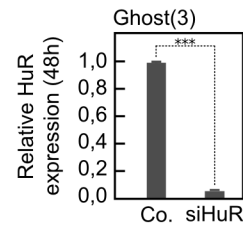**C**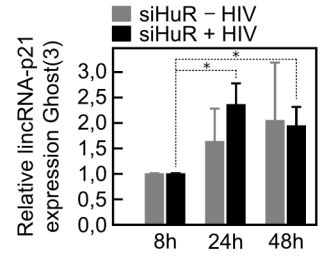**D**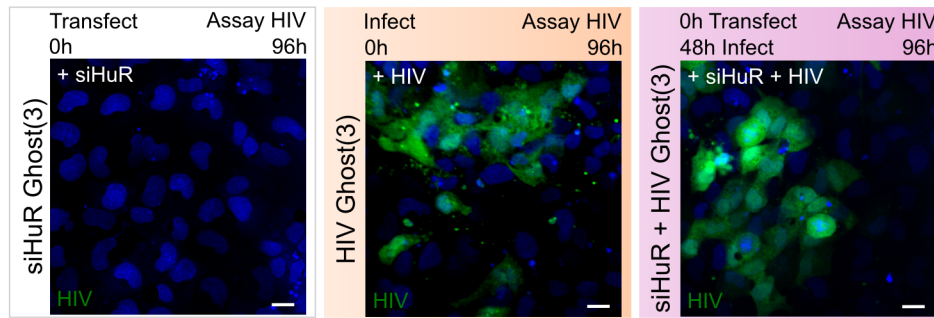**E**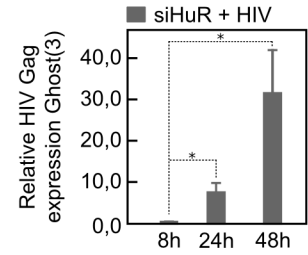**F**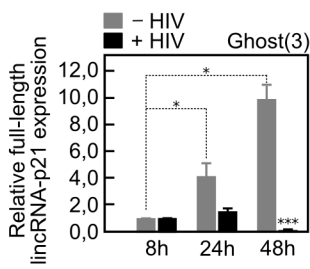**G**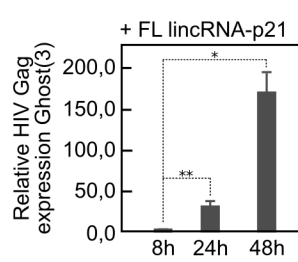**H**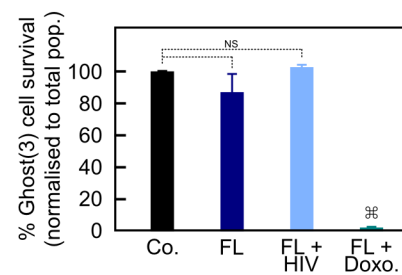**I**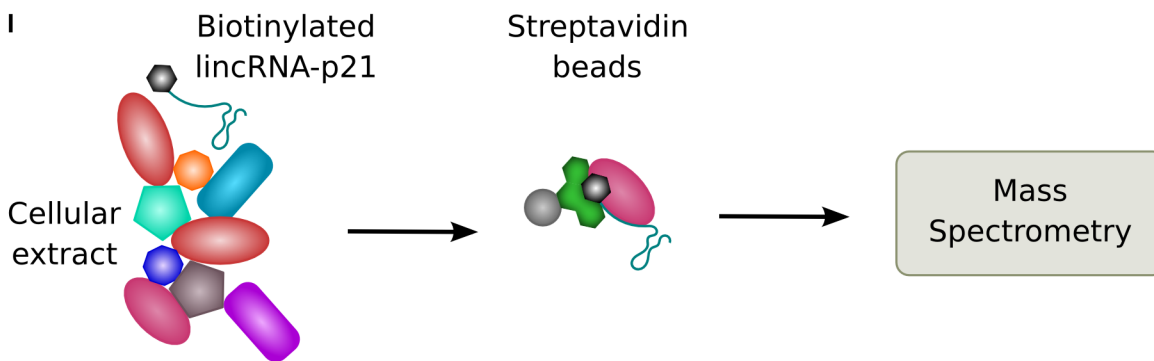**J**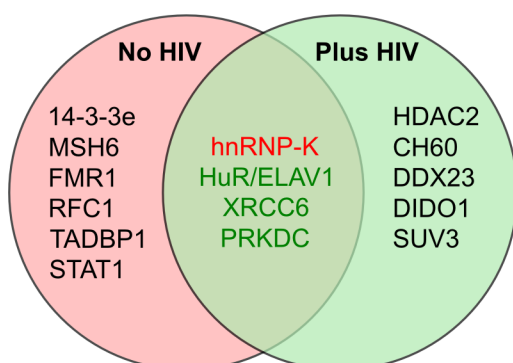

**Figure S3 A** Ghost(3) 24h

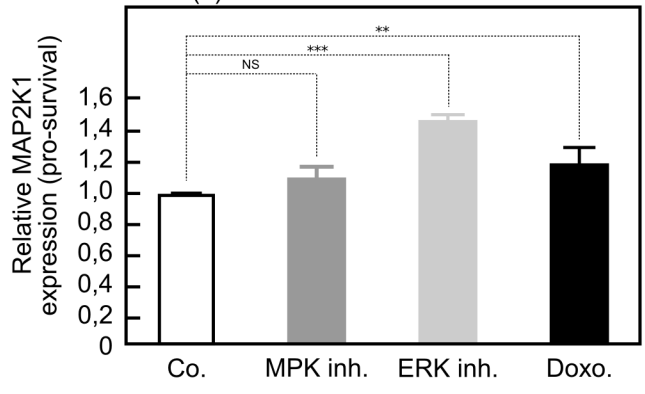

**B** Ghost(3) 24h

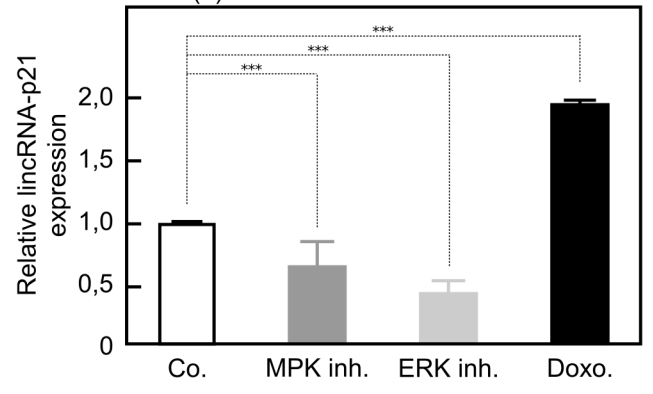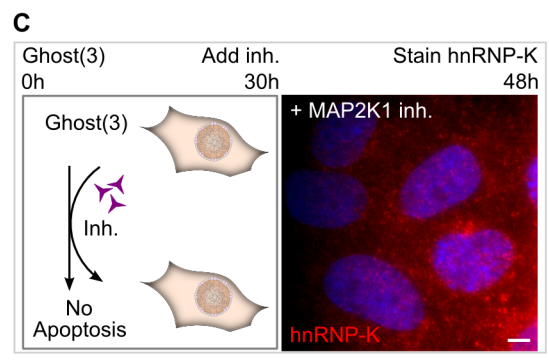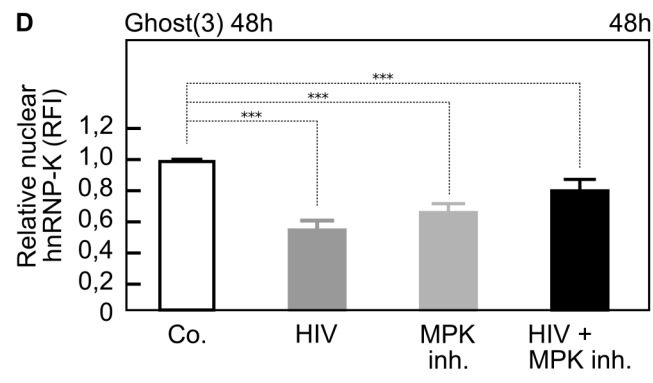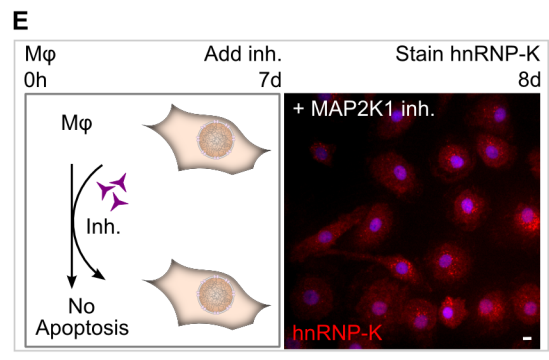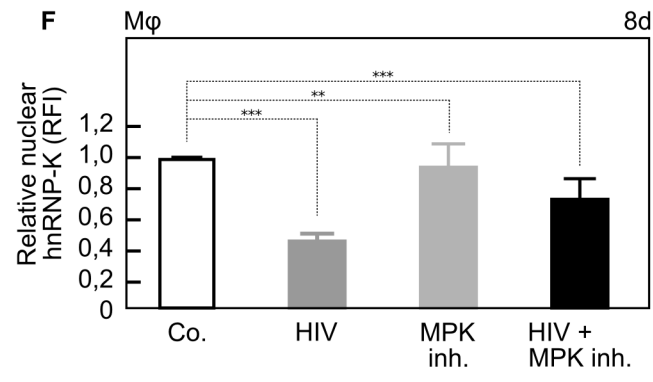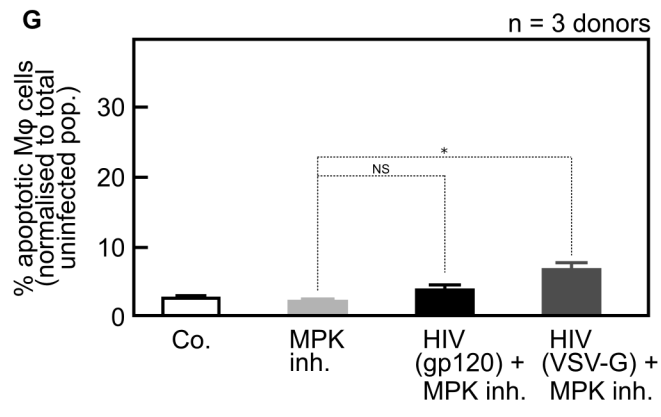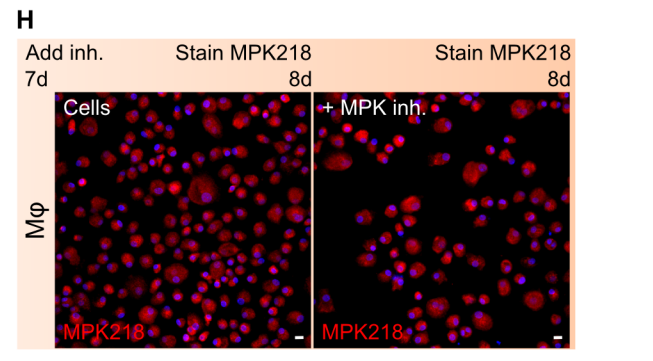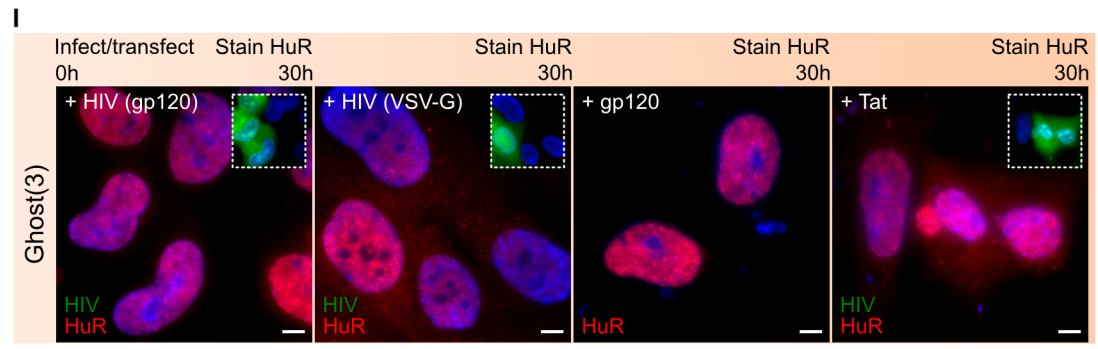

**Figure S4 A**

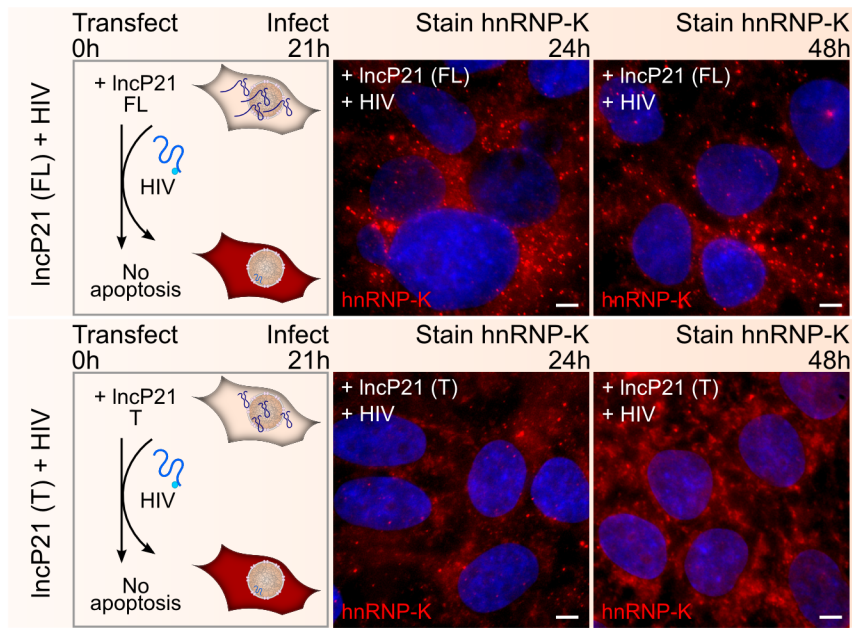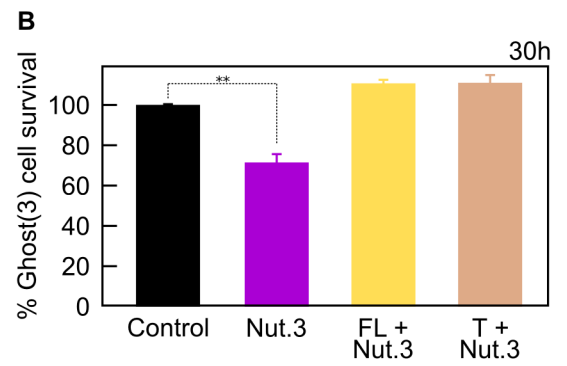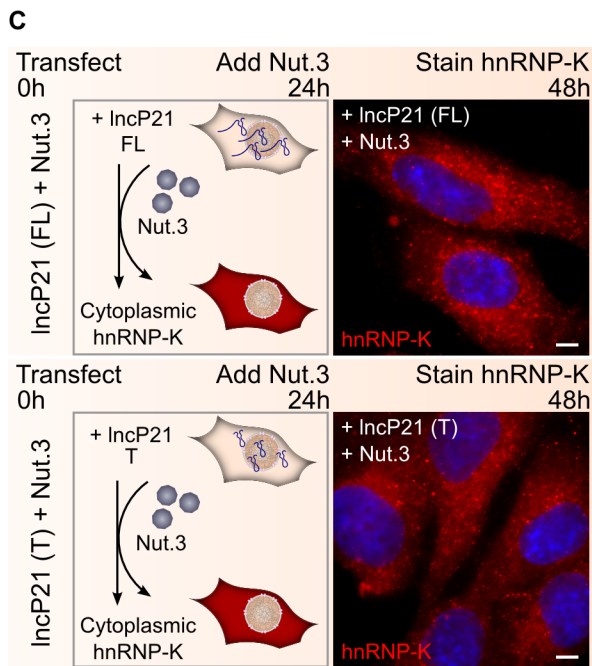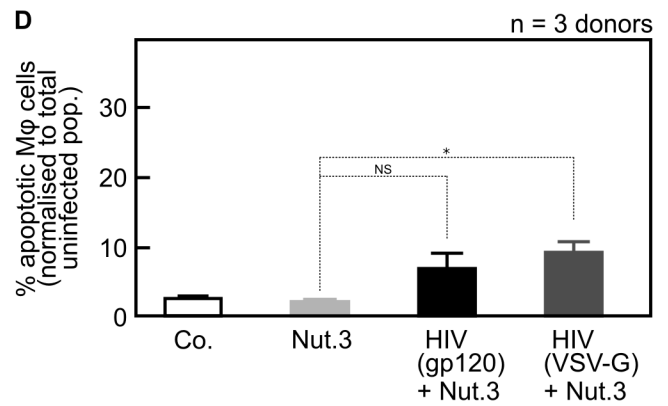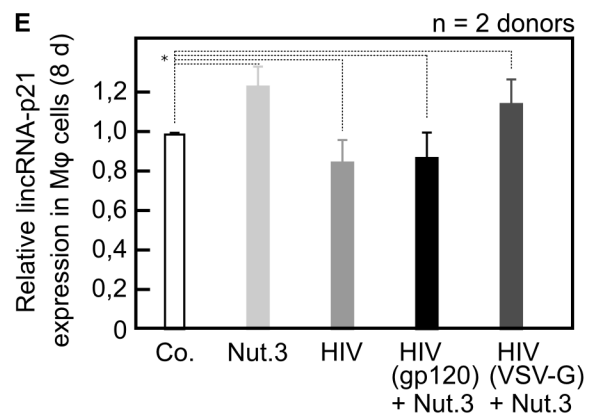

**F**

| Condition                                           | 1) DNA damage | 2) Elevated lincRNA-p21 | 3) Nuclear hnRNP-K | Apoptosis |
|-----------------------------------------------------|---------------|-------------------------|--------------------|-----------|
| Canonical DNA Damage (eg. Doxorubicin)              | Yes           | Yes                     | Yes                | Yes       |
| HIV infection                                       | Yes           | No                      | No                 | No        |
| HIV + Doxorubicin                                   | Yes           | No                      | Yes                | No        |
| Exogenous lincRNA-p21 (full-length)                 | No            | Yes                     | No                 | No        |
| Exogenous lincRNA-p21 (truncated)                   | No            | Yes                     | No                 | No        |
| Exogenous lincRNA-p21 (full-length) + HIV           | Yes           | No                      | No                 | No        |
| Exogenous lincRNA-p21 (truncated) + HIV             | Yes           | No                      | No                 | No        |
| Exogenous lincRNA-p21 (full-length) + Nutlin3       | No            | Yes                     | No                 | No        |
| Exogenous lincRNA-p21 (truncated) + Nutlin3         | No            | Yes                     | No                 | No        |
| HIV + Nutlin3                                       | Yes           | No                      | Yes                | No        |
| Nutlin3 + HIV                                       | Yes           | No                      | No                 | No        |
| Exogenous lincRNA-p21 (full-length) + HIV + Nutlin3 | Yes           | Yes                     | Yes                | Yes       |
| Exogenous lincRNA-p21 (truncated) + HIV + Nutlin3   | Yes           | Yes                     | Yes                | No        |
